# Supplementary material for: A non-lethal SPME-LC/MS method for the analysis of plastic-associated contaminants in coral reef invertebrates
Source: Royal Society of Chemistry journal article supplement (doi:10.1039/c9ay02621e), 2020-01-01
Supplement: c9ay02621e1.pdf [file c9ay02621e1.pdf]

**SUPPLEMENTARY**

**Table 1.** PAES concentration levels (ng/g) determined by liquid extraction (LE) and direct immersion microextraction (SPME) in specimens of *Danafungia scruposa* (DF) and *Tridacna maxima* (TM) collected along the Faafu atoll, Maldives. BDL = beyond the detection limit. Data are corrected by subtracting the average of five procedural blank

| <b>Sample</b> | <b>Extraction method</b> | <b>MEHP</b> | <b>DMP</b> | <b>DEP</b> | <b>DBP</b> | <b>BBzP</b> | <b>DEHP</b> |
|---------------|--------------------------|-------------|------------|------------|------------|-------------|-------------|
| <b>DF1</b>    | LE                       | BDL         | BDL        | BDL        | 1,8        | BDL         | 2,3         |
|               | SPME                     | BDL         | BDL        | 0,4        | 1,7        | BDL         | 2,2         |
| <b>DF2</b>    | LE                       | BDL         | 1,6        | BDL        | 1,2        | BDL         | 4,6         |
|               | SPME                     | BDL         | 1,4        | BDL        | 0,9        | BDL         | 4,5         |
| <b>DF3</b>    | LE                       | BDL         | BDL        | BDL        | 1,4        | 1           | 2,5         |
|               | SPME                     | BDL         | BDL        | BDL        | 1,2        | 0,9         | 2,5         |
| <b>TM1</b>    | LE                       | 1,8         | 4,5        | 2,3        | 2,4        | 1,9         | 7,4         |
|               | SPME                     | 1,7         | 4,3        | 2,1        | 2,0        | 1,7         | 6,7         |
